# Supplementary material for: Small One-Helix Proteins Are Essential for Photosynthesis in Arabidopsis
Source: PubMed Central journal article supplement (PMC5253381; doi:10.3389/fpls.2017.00007), 2017-01-23
Supplement: Table1.pdf [file Table1.pdf]

**Supplemental Table 1: Primers used in this study**

|          |                                   |                                                         |
|----------|-----------------------------------|---------------------------------------------------------|
| OHP1-f   | ATGAGCTCGTCGCCGTTATCT             | CDS cloning,<br>Northern probe synthesis,<br>genotyping |
| OHP1-r   | TTATAGAGGAAGATCGAGTCCTT           |                                                         |
| OHP2-f   | ATGTCAGTAGCTTCACCGATTC            |                                                         |
| OHP2-r   | TTTGTCTCTGAAACTCCACTGTA           |                                                         |
| ELIP1-f  | ATGGCAACAGCATCGTTCAACA            |                                                         |
| ELIP1-r  | TAATCCTCTCTGGTGCTGGAC             |                                                         |
| ACT2-f   | ACCTTGCTGGACGTGACCTTACTGAT        |                                                         |
| ACT2-r   | GTTGTCTCGTGGATTCCAGCAGCTT         |                                                         |
| OHP1-LP  | CGGAGAAAGAGAGCAGTGTAG             | Mutant genotyping                                       |
| OHP1-LP2 | GAAATATGAATGGATCGGAGAAAG          |                                                         |
| OHP1-RP  | ACTCTCTCAGAGCCGTTAGGT             |                                                         |
| OHP2-LP  | TCAGATGCTCTCAGACAGAAG             |                                                         |
| OHP2-RP  | TCAGATGCTCTCAGACAGAAG             |                                                         |
| GABI-LB  | CCCATTTGGACGTGAATGTAGACAC         |                                                         |
| 35S-3'-f | AATCCCACTATCCTTCGCAAGACC          | Complementation constructs                              |
| OHP1-cf  | CCGTCGCCACCATGAGCTCGTCGCCGTTATC   |                                                         |
| OHP1-cr  | TTGTTTATTAGAATTATAGAGGAAGATCGAGTC |                                                         |
| OHP2-cf  | CCGTCGCCACCATGTCAGTAGCTTCACCGATTC |                                                         |
| OHP2-cr  | TTGTTTATTAGAATTATTCCAAGTCTAGAATGC |                                                         |
